# Supplementary material
Source: PubMed Central journal article supplement (PMC3736751)

WEB MATERIAL.

| erythritol        |                          |         |
|-------------------|--------------------------|---------|
| covariate         | $\beta$ (standard error) | p value |
| age               | 1.29(0.12)               | <0.001  |
| gender            | 0.13(0.04)               | 0.005   |
| CHD               | 0.38(0.13)               | 0.003   |
| smoking           | 0.02(0.05)               | 0.635   |
| physical activity | -0.13(0.03)              | <0.001  |
| education         | -0.11(0.04)              | 0.004   |
| BMI               | 0.44(0.13)               | 0.001   |
| SBP               | 1.95(0.45)               | <0.001  |
| BP med            | 0.32(0.05)               | <0.001  |
| glucose           | 0.47(0.05)               | <0.001  |
| diabetes          | 0.44(0.06)               | <0.001  |
| TC : HDL ratio    | 0.28(0.03)               | <0.001  |
| lipid med         | 0.02(0.22)               | 0.913   |
| LVH               | 0.41(0.11)               | <0.001  |
| eGFR              | -6.28(0.36)              | <0.001  |

| pyroglutamine*        |                          |                  |
|-----------------------|--------------------------|------------------|
| covariate             | $\beta$ (standard error) | p value          |
| age                   | 0.62(0.12)               | <0.001           |
| gender                | 1.36(0.07)               | <0.001           |
| CHD                   | 0.40(0.13)               | 0.002            |
| smoking               | 0.34(0.05)               | <0.001           |
| physical activity     | -0.01(0.03)              | 0.782            |
| education             | 0.00(0.04)               | 0.965            |
| BMI                   | -1.09(0.12)              | <0.001           |
| SBP                   | 1.57(0.46)               | 0.001            |
| BP med                | -0.04(0.04)              | 0.420            |
| glucose               | -0.32(0.05)              | <0.001           |
| <b>diabetes</b>       | <b>-0.33(0.06)</b>       | <b>&lt;0.001</b> |
| <b>TC : HDL ratio</b> | <b>0.17(0.03)</b>        | <b>&lt;0.001</b> |
| lipid med             | -0.17(0.22)              | 0.447            |
| LVH                   | 0.16(0.10)               | 0.120            |
| eGFR                  | -5.03(0.37)              | <0.001           |

| N-acetylalanine   |                          |         |
|-------------------|--------------------------|---------|
| covariate         | $\beta$ (standard error) | p value |
| age               | 0.93(0.12)               | <0.001  |
| gender            | 0.10(0.04)               | 0.020   |
| CHD               | 0.21(0.12)               | 0.083   |
| smoking           | 0.02(0.05)               | 0.714   |
| physical activity | -0.10(0.03)              | 0.001   |
| education         | -0.13(0.04)              | <0.001  |
| BMI               | 0.53(0.13)               | <0.001  |
| SBP               | 2.13(0.45)               | <0.001  |
| BP med            | 0.32(0.05)               | <0.001  |
| glucose           | -0.22(0.05)              | <0.001  |
| diabetes          | -0.18(0.06)              | 0.002   |
| TC : HDL ratio    | 0.13(0.03)               | <0.001  |
| lipid med         | -0.02(0.22)              | 0.911   |
| LVH               | 0.35(0.11)               | 0.001   |
| eGFR              | -6.83(0.35)              | <0.001  |

| phenylacetylglutamine |                          |         |
|-----------------------|--------------------------|---------|
| covariate             | $\beta$ (standard error) | p value |
| age                   | 0.96(0.12)               | <0.001  |
| gender                | -0.03(0.04)              | 0.567   |
| CHD                   | 0.40(0.13)               | 0.002   |
| smoking               | -0.17(0.05)              | <0.001  |
| physical activity     | -0.13(0.03)              | <0.001  |
| education             | -0.16(0.04)              | <0.001  |
| BMI                   | -0.06(0.13)              | 0.625   |
| SBP                   | 0.74(0.46)               | 0.104   |
| BP med                | 0.18(0.05)               | <0.001  |
| glucose               | 0.17(0.05)               | 0.001   |
| diabetes              | 0.14(0.06)               | 0.019   |
| TC : HDL ratio        | 0.01(0.03)               | 0.698   |
| lipid med             | 0.22(0.22)               | 0.331   |
| LVH                   | 0.26(0.10)               | 0.011   |
| eGFR                  | -4.05(0.37)              | <0.001  |

Metabolite values are in the form of quartile ordinal scores; continuous variables used liner model (e.g. age= intercept+ $\beta$ \*quartile scores); categorical variables used logistic model (e.g. logit(CHD)= quartile scores).

Abbreviations: CHD, coronary heart disease; BMI, body mass index; SBP, systolic blood pressure; BP med, anti-hypertensive medication use; TC : HDL ratio, serum total cholesterol to high-density-cholesterol lipoprotein ratio; lipid med, lipid-lowering medication use; LVH, left ventricular hypertrophy; eGFR, estimated glomerular filtration rate.

Regression Coefficients with Established Risk Factors for Quartile-score of Sixteen HF Related Metabolites in Model 3

| p-cresol sulfate  |                          |         |
|-------------------|--------------------------|---------|
| covariate         | $\beta$ (standard error) | p value |
| age               | 0.59(0.12)               | <0.001  |
| gender            | -0.01(0.04)              | 0.841   |
| CHD               | 0.14(0.12)               | 0.254   |
| smoking           | -0.16(0.05)              | 0.001   |
| physical activity | -0.11(0.03)              | 0.001   |
| education         | -0.07(0.04)              | 0.044   |
| BMI               | -0.56(0.13)              | <0.001  |
| SBP               | -0.01(0.46)              | 0.989   |
| BP med            | 0.11(0.04)               | 0.018   |
| glucose           | 0.03(0.05)               | 0.623   |
| diabetes          | -0.02(0.06)              | 0.679   |
| TC : HDL ratio    | 0.02(0.03)               | 0.508   |
| lipid med         | -0.17(0.22)              | 0.447   |
| LVH               | 0.17(0.10)               | 0.098   |
| eGFR              | -3.40(0.38)              | <0.001  |

| X - 11429         |                          |         |
|-------------------|--------------------------|---------|
| covariate         | $\beta$ (standard error) | p value |
| age               | 1.00(0.12)               | <0.001  |
| gender            | 0.02(0.04)               | 0.672   |
| CHD               | 0.12(0.12)               | 0.307   |
| smoking           | 0.20(0.05)               | <0.001  |
| physical activity | -0.16(0.03)              | <0.001  |
| education         | -0.12(0.04)              | 0.001   |
| BMI               | 0.28(0.13)               | 0.026   |
| SBP               | 1.54(0.46)               | 0.001   |
| BP med            | 0.23(0.05)               | <0.001  |
| glucose           | -0.36(0.05)              | <0.001  |
| diabetes          | -0.34(0.06)              | <0.001  |
| TC : HDL ratio    | 0.02(0.03)               | 0.448   |
| lipid med         | -0.54(0.24)              | 0.028   |
| LVH               | 0.30(0.10)               | 0.005   |
| eGFE              | -5.56(0.36)              | <0.001  |

| pro-hydroxy-pro   |                          |         |
|-------------------|--------------------------|---------|
| covariate         | $\beta$ (standard error) | p value |
| age               | 0.69(0.12)               | <0.001  |
| gender            | 0.04(0.04)               | 0.370   |
| CHD               | 0.15(0.12)               | 0.209   |
| smoking           | 0.20(0.05)               | <0.001  |
| physical activity | -0.05(0.03)              | 0.131   |
| education         | -0.17(0.04)              | <0.001  |
| BMI               | -0.64(0.13)              | <0.001  |
| SBP               | 1.44(0.46)               | 0.002   |
| BP med            | -0.10(0.04)              | 0.031   |
| glucose           | -0.13(0.05)              | 0.020   |
| diabetes          | -0.08(0.06)              | 0.190   |
| TC : HDL ratio    | -0.06(0.03)              | 0.064   |
| lipid med         | -0.02(0.22)              | 0.912   |
| LVH               | 0.14(0.10)               | 0.177   |
| eGFR              | -3.20(0.38)              | <0.001  |

| X - 11687_200     |                          |         |
|-------------------|--------------------------|---------|
| covariate         | $\beta$ (standard error) | p value |
| age               | 0.61(0.11)               | <0.001  |
| gender            | 0.06(0.04)               | 0.144   |
| CHD               | 0.03(0.11)               | 0.810   |
| smoking           | 0.19(0.04)               | <0.001  |
| physical activity | -0.11(0.03)              | <0.001  |
| education         | -0.06(0.03)              | 0.098   |
| BMI               | 0.00(0.12)               | 0.993   |
| SBP               | 1.67(0.42)               | <0.001  |
| BP med            | 0.27(0.04)               | <0.001  |
| glucose           | 0.07(0.05)               | 0.132   |
| diabetes          | 0.08(0.05)               | 0.132   |
| TC : HDL ratio    | 0.12(0.03)               | <0.001  |
| lipid med         | -0.19(0.21)              | 0.368   |
| LVH               | 0.18(0.09)               | 0.050   |
| eGFE              | -3.64(0.35)              | <0.001  |

Metabolite values are in the form of quartile ordinal scores; continuous variables used liner model (e.g. age= intercept+ $\beta$ \*quartile scores); categorical variables used logistic model (e.g. logit(CHD)= quartile scores).

Abbreviations: CHD, coronary heart disease; BMI, body mass index; SBP, systolic blood pressure; BP med, anti-hypertensive medication use; TC : HDL ratio, serum total cholesterol to high-density-cholesterol lipoprotein ratio; lipid med, lipid-lowering medication use; LVH, left ventricular hypertrophy; eGFR, estimated glomerular filtration rate.

### Regression Coefficients with Established Risk Factors for Quartile-score of Sixteen HF Related Metabolites in Model 3

| X – 12096         |                          |         |
|-------------------|--------------------------|---------|
| covariate         | $\beta$ (standard error) | p value |
| age               | 0.92(0.12)               | <0.001  |
| gender            | -0.06(0.04)              | 0.161   |
| CHD               | 0.20(0.12)               | 0.106   |
| smoking           | 0.02(0.05)               | 0.635   |
| physical activity | -0.10(0.03)              | 0.001   |
| education         | -0.15(0.04)              | <0.001  |
| BMI               | 1.57(0.12)               | <0.001  |
| SBP               | 1.05(0.46)               | 0.021   |
| BP med            | 0.35(0.05)               | <0.001  |
| glucose           | 0.22(0.05)               | <0.001  |
| diabetes          | 0.28(0.06)               | <0.001  |
| TC : HDL ratio    | 0.33(0.03)               | <0.001  |
| lipid med         | -0.22(0.22)              | 0.330   |
| LVH               | 0.37(0.11)               | <0.001  |
| eGFR              | -4.51(0.37)              | <0.001  |

| X – 11334         |                          |         |
|-------------------|--------------------------|---------|
| covariate         | $\beta$ (standard error) | p value |
| age               | 0.95(0.12)               | <0.001  |
| gender            | 0.31(0.05)               | <0.001  |
| CHD               | 0.23(0.12)               | 0.064   |
| smoking           | -0.13(0.05)              | 0.006   |
| physical activity | -0.04(0.03)              | 0.156   |
| education         | -0.08(0.04)              | 0.041   |
| BMI               | 0.05(0.13)               | 0.701   |
| SBP               | 0.96(0.46)               | 0.036   |
| BP med            | 0.17(0.05)               | <0.001  |
| glucose           | -0.04(0.05)              | 0.406   |
| diabetes          | -0.02(0.06)              | 0.767   |
| TC : HDL ratio    | 0.11(0.03)               | <0.001  |
| lipid med         | 0.02(0.22)               | 0.913   |
| LVH               | 0.18(0.10)               | 0.080   |
| eGFR              | -5.87(0.36)              | <0.001  |

| X - 11787         |                          |         |
|-------------------|--------------------------|---------|
| covariate         | $\beta$ (standard error) | p value |
| age               | 1.07(0.12)               | <0.001  |
| gender            | 0.24(0.05)               | <0.001  |
| CHD               | 0.49(0.13)               | <0.001  |
| smoking           | 0.05(0.05)               | 0.255   |
| physical activity | -0.02(0.03)              | 0.412   |
| education         | -0.15(0.04)              | <0.001  |
| BMI               | 0.30(0.13)               | 0.019   |
| SBP               | 0.91(0.46)               | 0.047   |
| BP med            | 0.13(0.05)               | 0.003   |
| glucose           | 0.29(0.05)               | <0.001  |
| diabetes          | 0.29(0.06)               | <0.001  |
| TC : HDL ratio    | 0.15(0.03)               | <0.001  |
| lipid med         | 0.60(0.25)               | 0.017   |
| LVH               | 0.35(0.11)               | 0.001   |
| eGFR              | -3.76(0.38)              | <0.001  |

| X - 11423         |                          |         |
|-------------------|--------------------------|---------|
| covariate         | $\beta$ (standard error) | p value |
| age               | 0.78(0.12)               | <0.001  |
| gender            | 0.23(0.05)               | <0.001  |
| CHD               | 0.24(0.12)               | 0.050   |
| smoking           | 0.09(0.05)               | 0.053   |
| physical activity | -0.09(0.03)              | 0.002   |
| education         | 0.04(0.04)               | 0.312   |
| BMI               | -0.14(0.13)              | 0.283   |
| SBP               | 1.74(0.45)               | <0.001  |
| BP med            | 0.20(0.05)               | <0.001  |
| glucose           | -0.18(0.05)              | 0.001   |
| diabetes          | -0.19(0.06)              | 0.002   |
| TC : HDL ratio    | 0.16(0.03)               | <0.001  |
| lipid med         | -0.07(0.22)              | 0.737   |
| LVH               | 0.25(0.10)               | 0.015   |
| eGFR              | -6.20(0.36)              | <0.001  |

Metabolite values are in the form of quartile ordinal scores; continuous variables used liner model (e.g. age= intercept+ $\beta$ \*quartile scores); categorical variables used logistic model (e.g. logit(CHD)= quartile scores).

Abbreviations: CHD, coronary heart disease; BMI, body mass index; SBP, systolic blood pressure; BP med, anti-hypertensive medication use; TC : HDL ratio, serum total cholesterol to high-density-cholesterol lipoprotein ratio; lipid med, lipid-lowering medication use; LVH, left ventricular hypertrophy; eGFR, estimated glomerular filtration rate.

Regression Coefficients with Established Risk Factors for Quartile-score of Sixteen HF Related Metabolites in Model 3

| X – 04499         |                          |         |
|-------------------|--------------------------|---------|
| covariate         | $\beta$ (standard error) | p value |
| age               | 0.39(0.12)               | 0.001   |
| gender            | 0.12(0.04)               | 0.004   |
| CHD               | 0.07(0.12)               | 0.531   |
| smoking           | 0.21(0.05)               | <0.001  |
| physical activity | -0.05(0.03)              | 0.078   |
| education         | -0.07(0.04)              | 0.065   |
| BMI               | -0.16(0.12)              | 0.197   |
| SBP               | 1.04(0.44)               | 0.018   |
| BP med            | 0.16(0.04)               | <0.001  |
| glucose           | 0.12(0.05)               | 0.020   |
| diabetes          | 0.06(0.06)               | 0.285   |
| TC : HDL ratio    | 0.00(0.03)               | 0.936   |
| lipid med         | -0.03(0.21)              | 0.894   |
| LVH               | 0.21(0.10)               | 0.037   |
| eGFR              | -2.82(0.37)              | <0.001  |

| X - 11333         |                          |         |
|-------------------|--------------------------|---------|
| covariate         | $\beta$ (standard error) | p value |
| age               | 0.63(0.12)               | <0.001  |
| gender            | 0.32(0.05)               | <0.001  |
| CHD               | 0.27(0.12)               | 0.027   |
| smoking           | 0.22(0.05)               | <0.001  |
| physical activity | -0.04(0.03)              | 0.223   |
| education         | -0.10(0.04)              | 0.007   |
| BMI               | -0.02(0.13)              | 0.861   |
| SBP               | 1.39(0.46)               | 0.002   |
| BP med            | 0.23(0.05)               | <0.001  |
| glucose           | -0.02(0.05)              | 0.748   |
| diabetes          | 0.00(0.06)               | 0.953   |
| TC : HDL ratio    | 0.16(0.03)               | <0.001  |
| lipid med         | -0.07(0.22)              | 0.744   |
| LVH               | 0.20(0.10)               | 0.051   |
| eGFR              | -4.76(0.37)              | <0.001  |

| X - 11308         |                          |         |
|-------------------|--------------------------|---------|
| covariate         | $\beta$ (standard error) | p value |
| age               | -0.29(0.12)              | 0.020   |
| gender            | 0.17(0.04)               | <0.001  |
| CHD               | -0.09(0.12)              | 0.434   |
| smoking           | -0.13(0.05)              | 0.007   |
| physical activity | 0.18(0.03)               | <0.001  |
| education         | 0.21(0.04)               | <0.001  |
| BMI               | -0.71(0.13)              | <0.001  |
| SBP               | -2.02(0.45)              | <0.001  |
| BP med            | -0.13(0.05)              | 0.003   |
| glucose           | -0.11(0.05)              | 0.049   |
| diabetes          | -0.07(0.06)              | 0.237   |
| TC : HDL ratio    | -0.02(0.03)              | 0.450   |
| lipid med         | -0.02(0.22)              | 0.913   |
| LVH               | -0.01(0.10)              | 0.960   |
| eGFR              | -0.07(0.39)              | 0.866   |

| X - 11564         |                          |         |
|-------------------|--------------------------|---------|
| covariate         | $\beta$ (standard error) | p value |
| age               | 0.94(0.12)               | <0.001  |
| gender            | 0.37(0.05)               | <0.001  |
| CHD               | 0.42(0.13)               | 0.001   |
| smoking           | 0.18(0.05)               | <0.001  |
| physical activity | -0.15(0.03)              | <0.001  |
| education         | -0.09(0.04)              | 0.017   |
| BMI               | 0.15(0.13)               | 0.234   |
| SBP               | 2.36(0.45)               | <0.001  |
| BP med            | 0.26(0.05)               | <0.001  |
| glucose           | -0.03(0.05)              | 0.599   |
| diabetes          | 0.02(0.06)               | 0.722   |
| TC : HDL ratio    | 0.09(0.03)               | 0.006   |
| lipid med         | -0.22(0.22)              | 0.330   |
| LVH               | 0.27(0.10)               | 0.008   |
| eGFR              | -5.10(0.37)              | <0.001  |

Metabolite values are in the form of quartile ordinal scores; continuous variables used liner model (e.g. age= intercept+ $\beta$ \*quartile scores); categorical variables used logistic model (e.g. logit(CHD)= quartile scores).

Abbreviations: CHD, coronary heart disease; BMI, body mass index; SBP, systolic blood pressure; BP med, anti-hypertensive medication use; TC : HDL ratio, serum total cholesterol to high-density-cholesterol lipoprotein ratio; lipid med, lipid-lowering medication use; LVH, left ventricular hypertrophy; eGFR, estimated glomerular filtration rate.

The  $\beta$  regression coefficient (standard error as well as the p value testing the association of the ordinal quartile score of each of the 16 metabolites identified in Model 3 and the covariates adjusted in Model 4 are presented in the above tables. Consistently, most of the metabolites were significantly related to eGFR (except for X- 11308), while few of them were related to lipid-lowering medication use (except for X-11787 and X-11429). Their associations with the other established risk factors (covariates) vary among different metabolites.

Figure S1. Cumulative Hazards Curves of Incident Hospitalized Heart Failure across Quartiles of the Three Candidate Metabolites Identified in Model 4 among 1,744 African Americans in Jackson, MS field center of the Atherosclerosis Risk in Communities Study over the Period from 1987 to 2008.

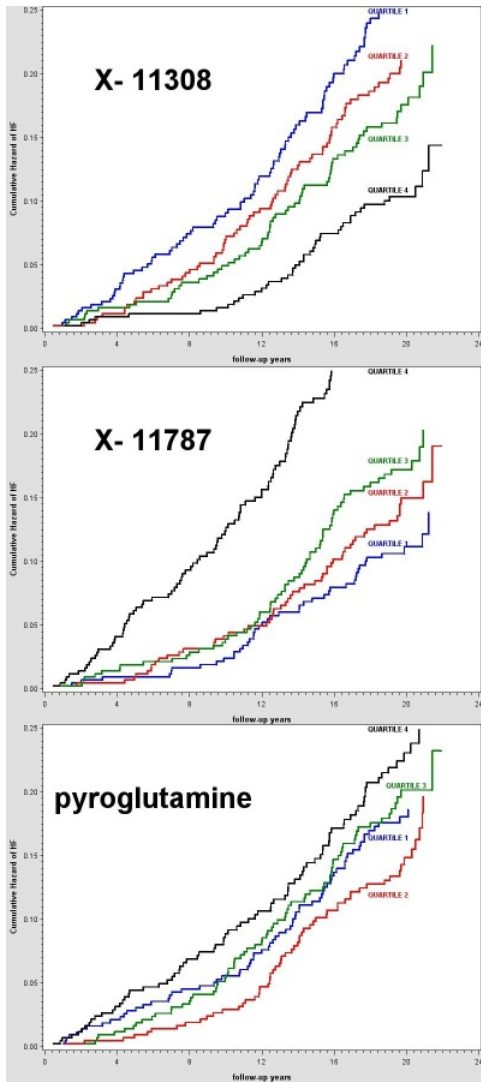

Figure S2. Heat map of Metabolite-Metabolite Correlations among All 187 Metabolites (Treated as Continuous Variables, Figure A) and among the 16 Metabolites Significant in Model 3 (Figure B) collected at 1986-1987 among 1,744 African Americans in Jackson, MS field center of the Atherosclerosis Risk in Communities Study. Metabolites were grouped by pathway and the three metabolites identified in Model 4 are labeled on the diagonal axis in Figure

A.

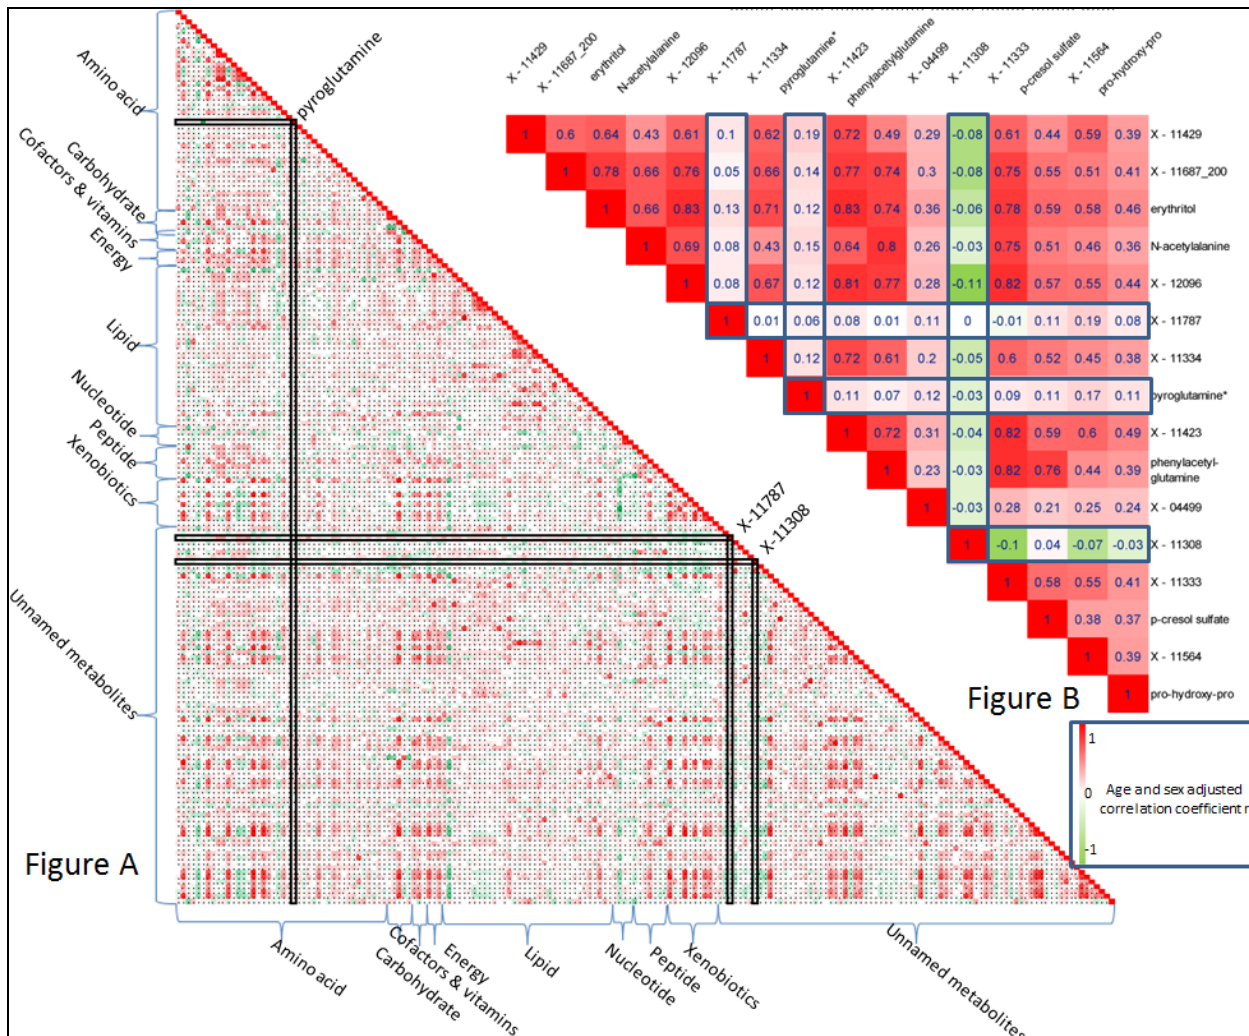

Supplement: supp_kwt004_kwt004_Web_Material.pdf [file supp_kwt004_kwt004_Web_Material.pdf]
